# Supplementary material for: A study on the high efficiency reduction of p-nitrophenol (4-NP) by a Fe(OH)3/Fe2O3@Au composite catalyst
Source: Royal Society of Chemistry journal article supplement (doi:10.1039/d1ra04073a), 2021-01-01
Supplement: d1ra04073a1.pdf [file d1ra04073a1.pdf]

## Supporting Information

### Study on high efficiency reduction of p-nitrophenol (4-NP) by $\text{Fe}(\text{OH})_3/\text{Fe}_2\text{O}_3@\text{Au}$ composite catalyst

Meirong Fu,<sup>a</sup> Mingqiang Li,<sup>a</sup> Yingying Zhao,<sup>a</sup> Yunxiang Bai,<sup>a</sup> Xingzhong Fang,<sup>a</sup>  
Xiaolong Kang,<sup>a</sup> Min Yang,<sup>a</sup> Yanping Wei<sup>a</sup> and Xia Xu<sup>\*a</sup>

<sup>a</sup> College of Science, Gansu Agricultural University, No.1 yingmen Village, Lanzhou 730070,  
P. R. China.

\* Corresponding authors.

E-mail addresses: xuxia@gsau.edu.cn

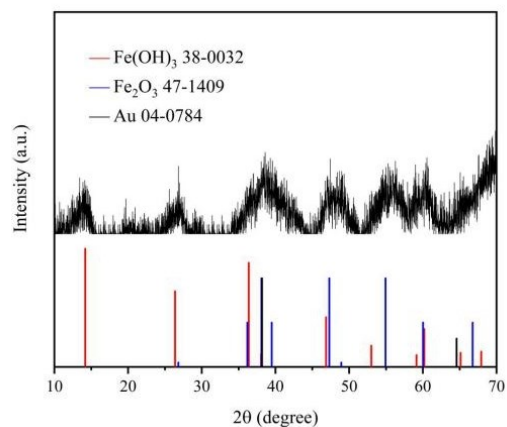

**Fig. S1** X-ray powder diffraction (XRD) pattern of  $\text{Fe}(\text{OH})_3/\text{Fe}_2\text{O}_3@\text{Au}$  sample.

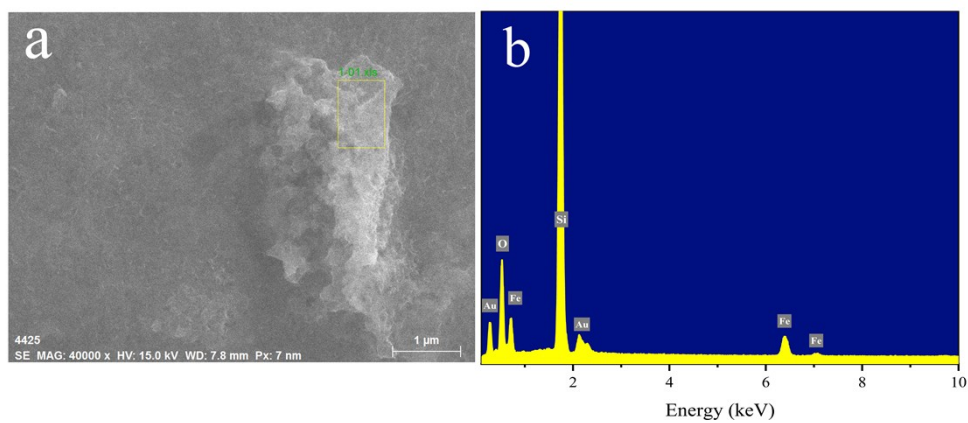

**Fig. S2** (a) SEM and (b) EDX of the synthesized  $\text{Fe}(\text{OH})_3/\text{Fe}_2\text{O}_3@\text{Au}$ .

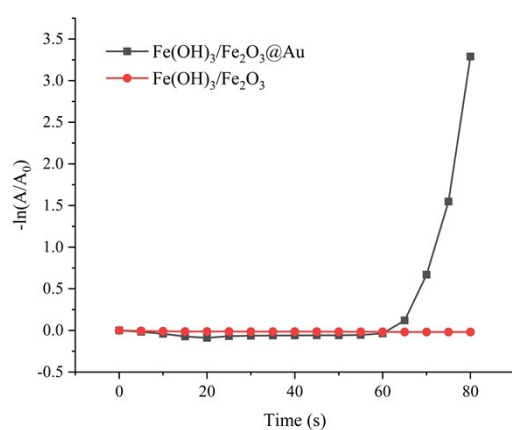

**Fig. S3** Plots of  $-\ln(A/A_0)$  versus reaction time  $t$  for the reduction of 4-NP catalyzed by  $\text{Fe}(\text{OH})_3/\text{Fe}_2\text{O}_3@\text{Au}$  and  $\text{Fe}(\text{OH})_3/\text{Fe}_2\text{O}_3$ .

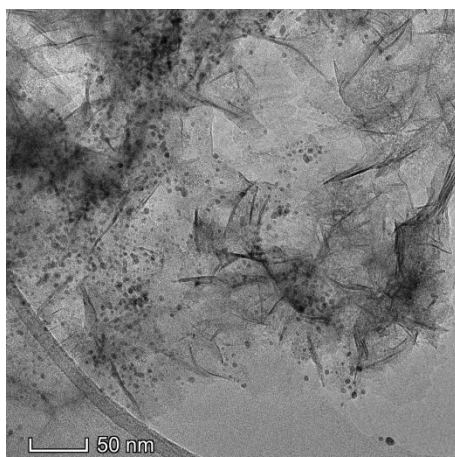

**Fig. S4** The TEM image of Fe(OH)<sub>3</sub>/Fe<sub>2</sub>O<sub>3</sub>@Au after three cycles of catalytic reduction of 4-NP.
